# Supplementary figures and images for: Update οn the diagnosis and management of systemic lupus erythematosus
Source: HighWire-hosted journal article supplement (doi:10.1136/annrheumdis-2020-218272), 2020-10-13

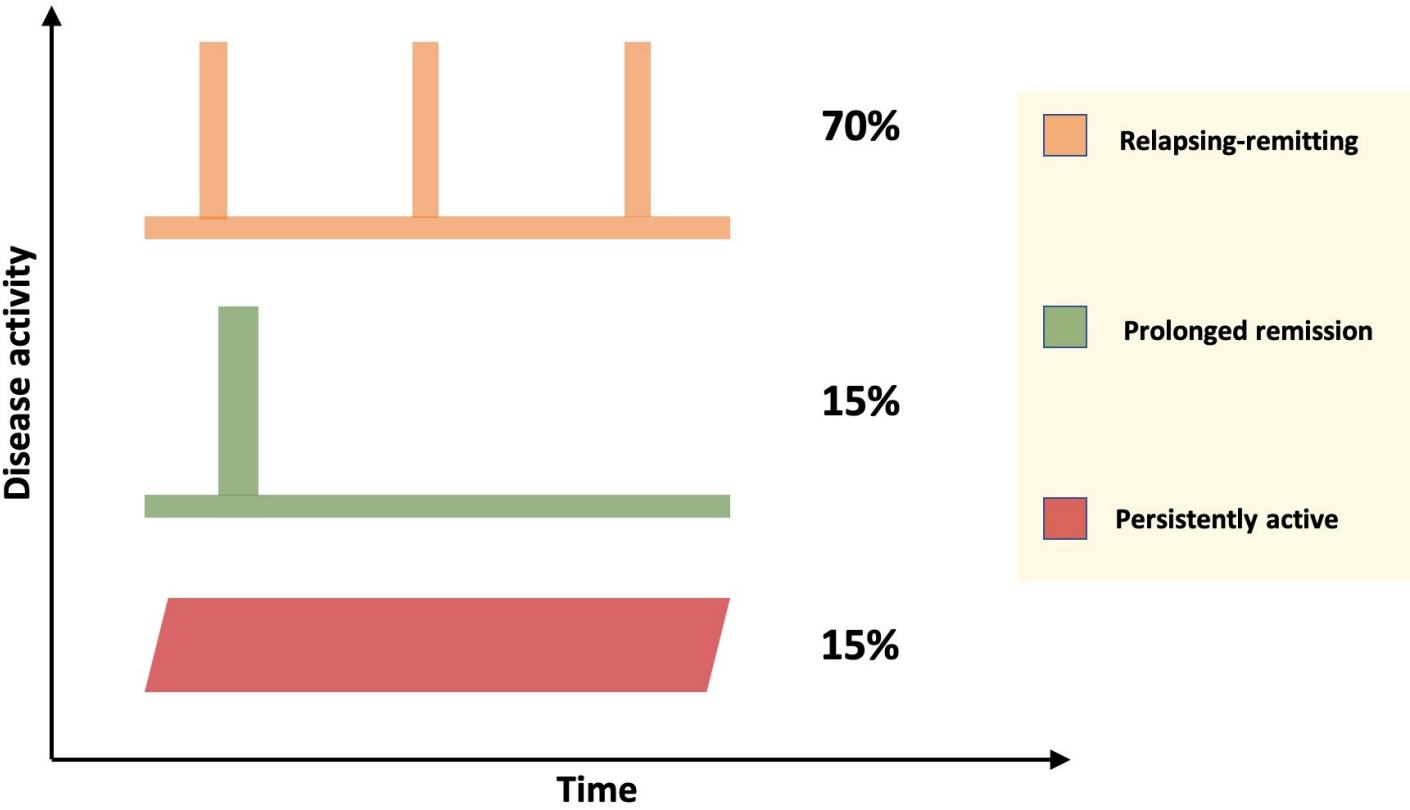

Supplement: annrheumdis-2020-218272supp003_data_supplement.pdf [file annrheumdis-2020-218272supp003_data_supplement.pdf]

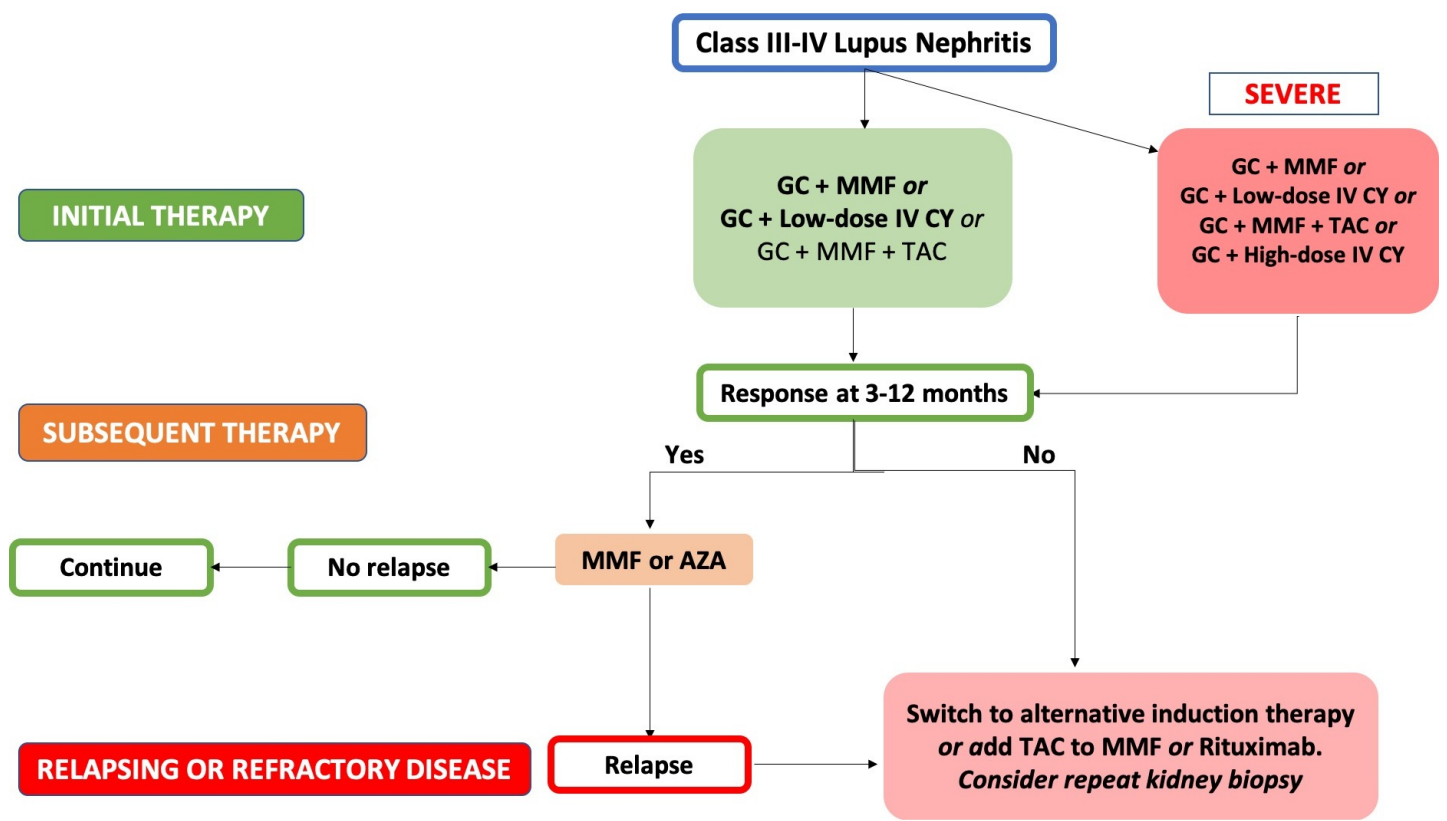

Supplement: annrheumdis-2020-218272supp005_data_supplement.pdf [file annrheumdis-2020-218272supp005_data_supplement.pdf]

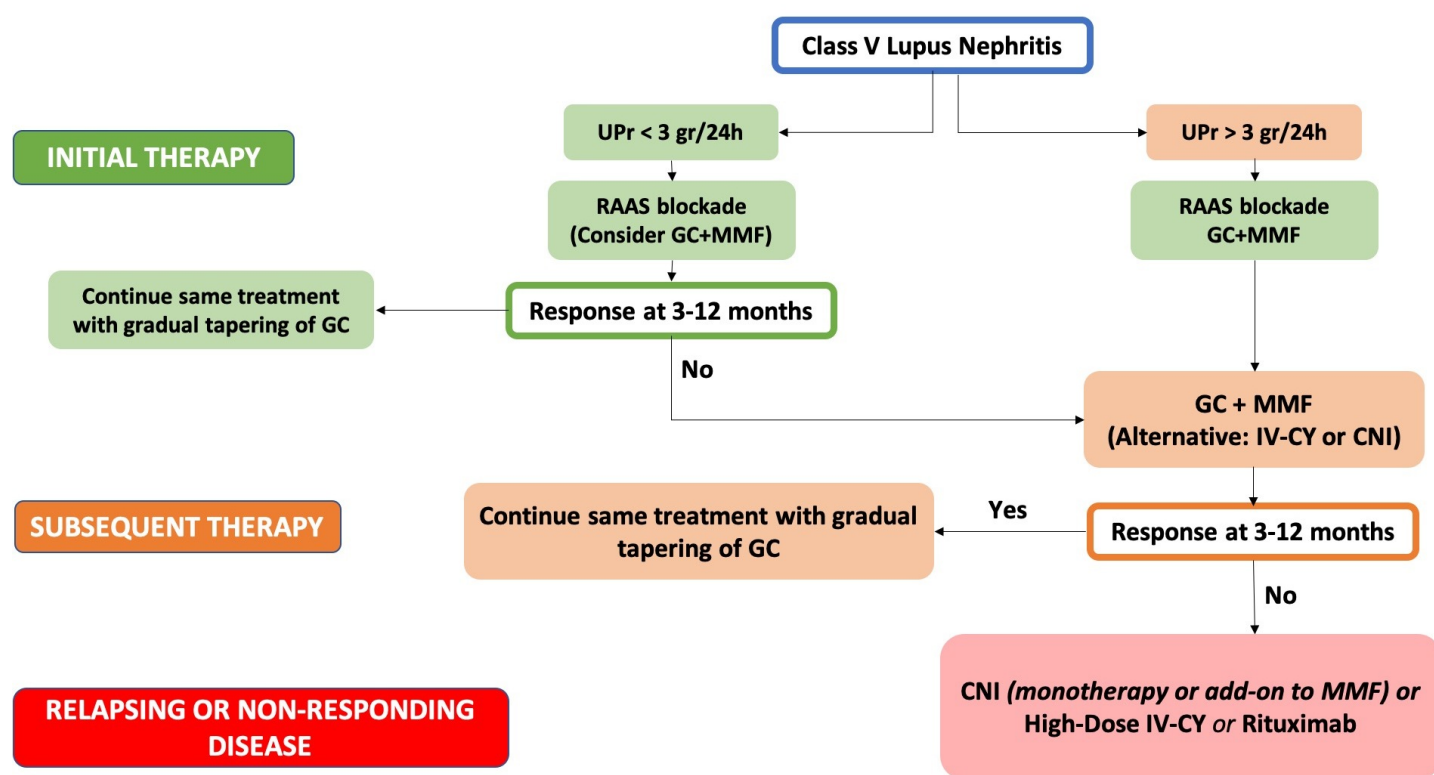

Supplement: annrheumdis-2020-218272supp006_data_supplement.pdf [file annrheumdis-2020-218272supp006_data_supplement.pdf]

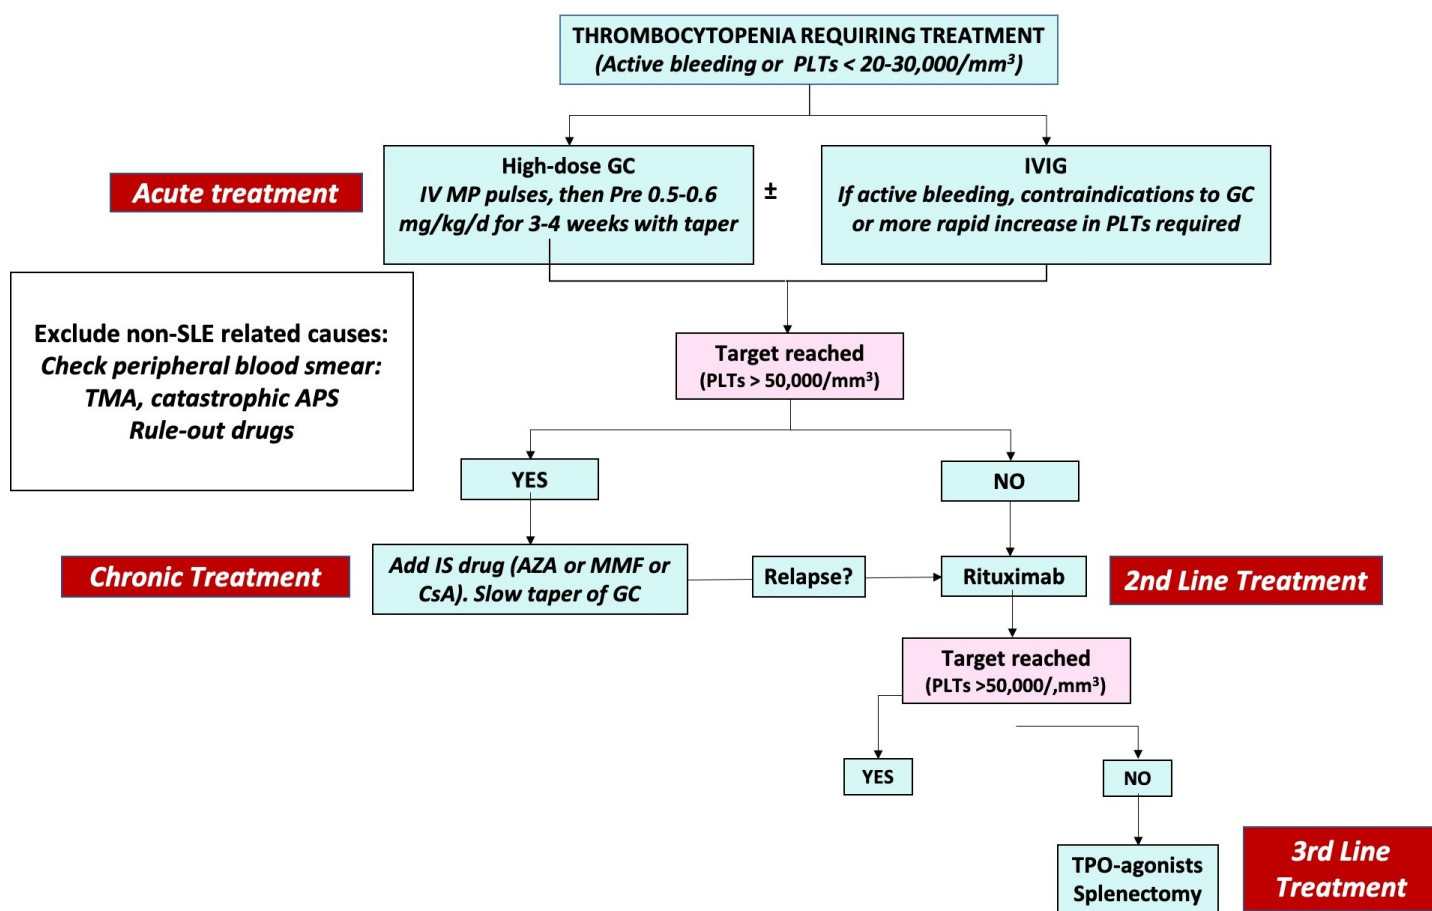

Supplement: annrheumdis-2020-218272supp008_data_supplement.pdf [file annrheumdis-2020-218272supp008_data_supplement.pdf]

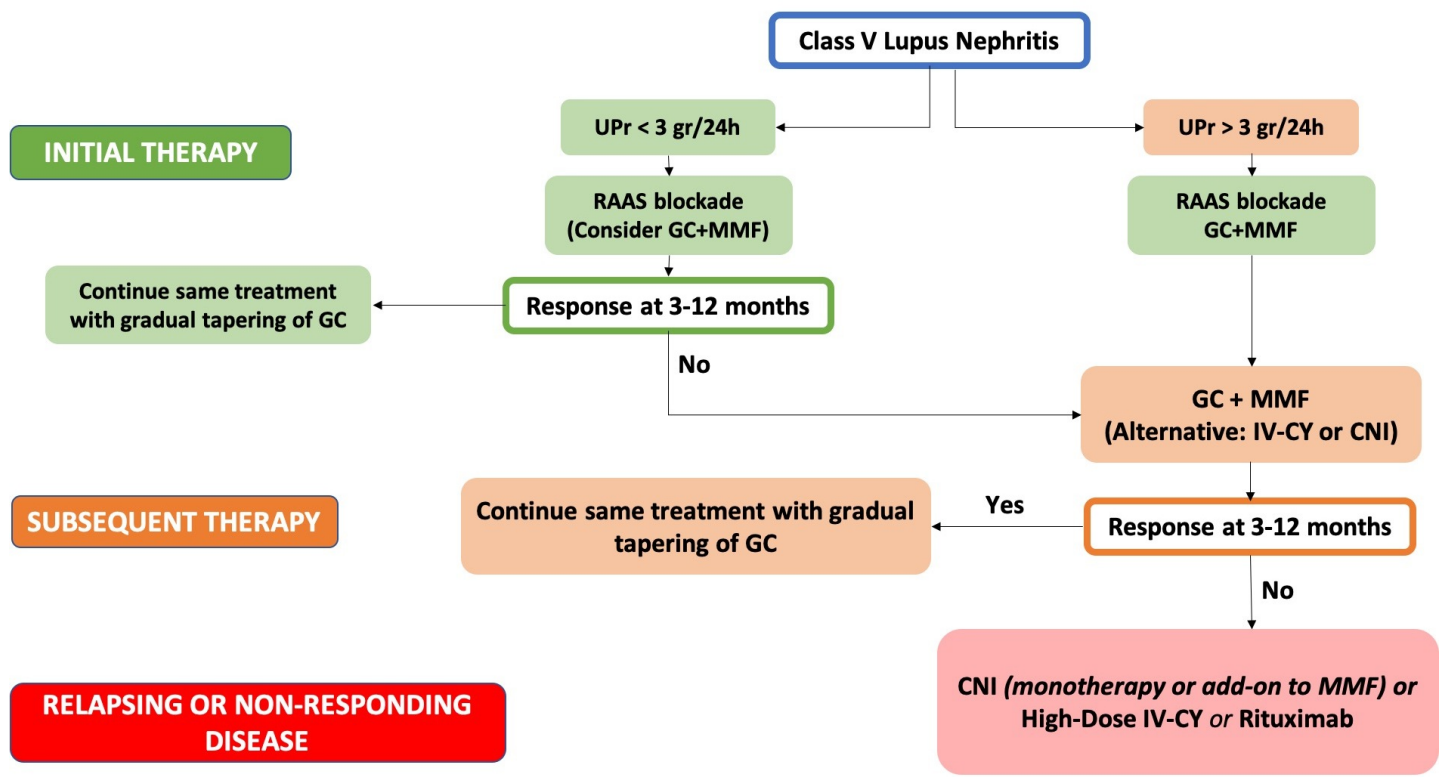

Supplement: annrheumdis-2020-218272supp006_data_supplement.pdf [file annrheumdis-2020-218272supp006_data_supplement.pdf]
